# Supplementary material for: Risk of Parkinson Disease and Secondary Parkinsonism in Myocardial Infarction Survivors
Source: PubMed Central journal article supplement — J Am Heart Assoc. 2022 Feb 16;11(5):e022768. doi: 10.1161/JAHA.121.022768 (PMC9075091; doi:10.1161/jaha.121.022768), 2022-02-16

## **SUPPLEMENTAL MATERIAL**

**Table S1.** Codes used in the study.

| Disease                                                        | ICD-8 codes                                    | ICD-10 codes                                                    | ATC code                                                                                                                                                                                                                                                                                                                                                                                                                                                                                                                                      | Procedure codes |
|----------------------------------------------------------------|------------------------------------------------|-----------------------------------------------------------------|-----------------------------------------------------------------------------------------------------------------------------------------------------------------------------------------------------------------------------------------------------------------------------------------------------------------------------------------------------------------------------------------------------------------------------------------------------------------------------------------------------------------------------------------------|-----------------|
| <b>Cardiovascular diseases</b>                                 |                                                |                                                                 |                                                                                                                                                                                                                                                                                                                                                                                                                                                                                                                                               |                 |
| Myocardial infarction ST-segment myocardial infarction (STEMI) | 410                                            | I21                                                             |                                                                                                                                                                                                                                                                                                                                                                                                                                                                                                                                               |                 |
| Non-STEMI                                                      | N/A                                            | I211B, I210B, I213                                              |                                                                                                                                                                                                                                                                                                                                                                                                                                                                                                                                               |                 |
| Heart failure                                                  | 427.09, 427.10, 427.11, 427.19, 428.99, 782.49 | I211A, I210A, I214                                              |                                                                                                                                                                                                                                                                                                                                                                                                                                                                                                                                               |                 |
| Angina pectoris                                                | 413                                            | I50, I11.0, I13.0, I13.2                                        |                                                                                                                                                                                                                                                                                                                                                                                                                                                                                                                                               |                 |
| Atrial fibrillation or flutter                                 | 427.93, 427.94                                 | I20 (except I20.0), I25.1, I25.9                                |                                                                                                                                                                                                                                                                                                                                                                                                                                                                                                                                               |                 |
| Valvular heart disease                                         | 394-398                                        | I48                                                             |                                                                                                                                                                                                                                                                                                                                                                                                                                                                                                                                               |                 |
| Hypercholesterolemia                                           | 272.00                                         | I05, I06, I07, I08.0, I09.8, I34-I37, I39.0, I39.3, I51.1A, Q22 |                                                                                                                                                                                                                                                                                                                                                                                                                                                                                                                                               |                 |
| Hypertension                                                   | 400-404                                        | E780                                                            |                                                                                                                                                                                                                                                                                                                                                                                                                                                                                                                                               |                 |
|                                                                |                                                | DI10-DI15, I67.4                                                | Combination treatment of at least two redeemed prescriptions for different types of the following classes of antihypertensive drugs within 180 days prior to myocardial infarction: $\alpha$ adrenergic blockers, ATC: C02A, C02B, C02C, non-loop diuretics, ATC: C02DA, C02L, C03A, C03B, C03D, C03E, C03X, C07C, C07D, C08G, C09BA, C09DA, C09XA52, vasodilators, ATC: C02DB, C02DD, C02DG, C04, C05, $\beta$ -blockers, ATC: C07, calcium channel blockers, ATC: C07F, C08, C09BB, C09DB, and reninangiotensin system inhibitors, ATC: C09 |                 |
| Stroke (ischemic and intracerebral)                            | 431, 433-434                                   | I61, I63-I64                                                    |                                                                                                                                                                                                                                                                                                                                                                                                                                                                                                                                               |                 |

|                                                             |                                                                   |                                                                             |                                 |
|-------------------------------------------------------------|-------------------------------------------------------------------|-----------------------------------------------------------------------------|---------------------------------|
| Intermittent claudication                                   | 443.89–443.99                                                     | I73.9                                                                       |                                 |
| Cardiogenic shock and pulmonary edema                       | 427.10, 427.11                                                    | J81, I501B, R570                                                            |                                 |
| <b>Non-cardiovascular diseases</b>                          |                                                                   |                                                                             |                                 |
| Obesity                                                     | 277                                                               | E65-E68                                                                     |                                 |
| Diabetes mellitus                                           | 249, 250 (excluding 249.02, 250.02)                               | E10 (excluding E10.2), E11 (excluding E11.2), H36.0                         | MA10 any time before index time |
| Chronic pulmonary disease                                   | 490-493; 515-518                                                  | J40-J47; J60-J67; J68.4; J70.1; J70.3; J84.1; J92.0; J96.1; J98.2; J98.3    |                                 |
| Alcoholism-related diseases                                 | 980, 291.09-291.99, 303.09-303.99, 571.09-571.11, 577.10          | F10 (except F10.0), G31.2, G62.1, G72.1, I42.6, K29.2, K86.0, Z72.1         |                                 |
| Head trauma                                                 | 800-803, 850-854                                                  | S00-S09                                                                     |                                 |
| Depression                                                  | 296.09, 296.29, 298.09, 300.49                                    | F32-F33                                                                     |                                 |
| Osteoarthritis                                              | 713                                                               | M15-M19                                                                     |                                 |
| Anemia                                                      | 280-281, 283-285                                                  | D50-55, D59, D61-D64                                                        |                                 |
| Chronic kidney disease                                      | 249.02, 250.02, 753.10-753.19, 582, 583, 584, 590.09, 593.20, 792 | E10.2, E11.2, E14.2, N03, N05, N11.0, N14, N16, N18-N19, N26.9, Q61.1-Q61.4 |                                 |
| <b>Drug frequently causing parkinsonism</b>                 |                                                                   |                                                                             |                                 |
| Typical antipsychotics (piperazine side chain neuroleptics) |                                                                   |                                                                             | N05AB                           |
| Calcium-channel blockers                                    |                                                                   |                                                                             | C08                             |
| <b>Outcomes</b>                                             |                                                                   |                                                                             |                                 |
| Parkinson's disease                                         | 342                                                               | G20                                                                         |                                 |
| Secondary parkinsonism                                      | –                                                                 | G21-G22                                                                     |                                 |
| <b>Procedures during admission</b>                          |                                                                   |                                                                             |                                 |

Coronary artery  
bypass graft surgery

Before 1996:  
30009, 30019,  
30029, 30039,  
30049, 30059,  
30069, 30079,  
30089, 30099,  
30109, 30119,  
30120, 30129,  
30139, 30149,  
30159, 30169,  
30179, 30189,  
30199, 30200

Percutaneous  
coronary intervention

After 1996:  
KFNA-E, KFNH20  
Before 1996:  
30350, 30354, 30240

Pacemaker

After 1996:  
KFNG, KFNF  
Before 1996: 30930,  
32140, 32199, 32490  
After 1996: BFCA

---

**Table S2.** Modified Charlson Comorbidity Index conditions.

| <b>Disease</b>                   | <b>Weight</b> |                                                                                                                                  |
|----------------------------------|---------------|----------------------------------------------------------------------------------------------------------------------------------|
| Peripheral vascular disease      | 1             | ICD-8: 440, 441, 442, 443, 444, 445; ICD-10: I70, I71, I72, I73, I74, I77                                                        |
| Cerebrovascular disease          |               | ICD-8: 430-438; ICD-10: I60-I69, G45, G46                                                                                        |
| Dementia                         |               | ICD-8: 290.09-290.19, 293.09; ICD-10: F00-F03, F05.1, G30                                                                        |
| Connective tissue disease        |               | ICD-8: 712, 716, 734, 446, 135.99; ICD-10: M05, M06, M08, M09, M30, M31, M32, M33, M34, M35, M36, D86                            |
| Ulcer disease                    |               | ICD-8: 530.91, 530.98, 531-534; ICD-10: K22.1, K25-K28                                                                           |
| Mild liver disease               |               | ICD-8: 571, 57301, 57304; ICD-10: B18, K70.0-K70.3, K70.9, K71, K73, K74, K76.0                                                  |
| Hemiplegia                       | 2             | ICD-8: 344; ICD-10: G81, G82                                                                                                     |
| Non-metastatic solid tumor       |               | ICD-8: 140-194; ICD-10: C00-C75                                                                                                  |
| Leukemia                         |               | ICD-8: 204-207; ICD-10: C91-C95                                                                                                  |
| Lymphoma                         |               | ICD-8: 200-203, 275.59; ICD-10: C81-C85, C88, C90, C96                                                                           |
| Moderate to severe liver disease | 3             | ICD-8: 070.00, 070.02, 070.04, 070.06, 070.08, 573.00, 456.00-456.09; ICD-10: B15.0, B16.0, B16.2, B19.0, K70.4, K72, K76.6, I85 |
| Metastatic cancer                | 6             | ICD-8: 195-198, 199; ICD-10: C76-C80                                                                                             |
| AIDS                             |               | ICD-8: 079.83; ICD-10: B21-B24                                                                                                   |

**Table S3.** Characteristics of myocardial infarction survivors and members of the general population comparison cohort at 1 year after myocardial infarction, Denmark, 1995-2012.

| Characteristics                                             | Myocardial infarction cohort<br>(n=131,396) | Comparison cohort<br>(n=630,166) |
|-------------------------------------------------------------|---------------------------------------------|----------------------------------|
| <b>Male</b>                                                 | 84,818 (64.6)                               | 408,024 (64.7)                   |
| <b>Age, years</b>                                           |                                             |                                  |
| <60                                                         | 39,027 (29.7)                               | 193,419 (30.7)                   |
| 60–69                                                       | 34,235 (26.1)                               | 167,756 (26.6)                   |
| 70–79                                                       | 33,882 (25.8)                               | 161,726 (25.7)                   |
| ≥80                                                         | 24,252 (18.5)                               | 107,265 (17.0)                   |
| Median (25th–75th percentile)                               | 67 (57–77)                                  | 67 (57–76)                       |
| <b>Decade of diagnosis / index date</b>                     |                                             |                                  |
| 1996–1999                                                   | 28,448 (21.7)                               | 136,107 (21.6)                   |
| 2000–2004                                                   | 34,128 (26.0)                               | 162,980 (25.9)                   |
| 2005–2009                                                   | 31,361 (23.9)                               | 150,336 (23.9)                   |
| 2010–2016                                                   | 37,459 (28.5)                               | 180,743 (28.7)                   |
| <b>Comorbidity</b>                                          |                                             |                                  |
| Heart failure                                               | 28,317 (21.6)                               | 18,318 (2.9)                     |
| Angina pectoris                                             | 77,330 (58.9)                               | 39,782 (6.3)                     |
| Atrial fibrillation or flutter                              | 17,524 (13.3)                               | 34,016 (5.4)                     |
| Valvular heart disease                                      | 8,068 (6.1)                                 | 11,615 (1.8)                     |
| Hypercholesterolemia                                        | 35,356 (26.9)                               | 18,976 (3.0)                     |
| Hypertension                                                | 81,433 (62.0)                               | 150,163 (23.8)                   |
| Stroke                                                      | 10,826 (8.2)                                | 29,127 (4.6)                     |
| Intermittent claudication                                   | 4,996 (3.8)                                 | 6,607 (1.0)                      |
| Obesity                                                     | 8,012 (6.1)                                 | 13,978 (2.2)                     |
| Diabetes mellitus                                           | 21,264 (16.2)                               | 48,656 (7.7)                     |
| Chronic pulmonary disease                                   | 16,160 (12.3)                               | 39,467 (6.3)                     |
| Alcoholism-related diseases                                 | 4,562 (3.5)                                 | 17,411 (2.8)                     |
| Head trauma                                                 | 9,537 (7.3)                                 | 40,078 (6.4)                     |
| Osteoarthritis                                              | 17,269 (13.1)                               | 70,382 (11.2)                    |
| Anemia                                                      | 9,540 (7.3)                                 | 18,388 (2.9)                     |
| Chronic kidney disease                                      | 5,828 (4.4)                                 | 8,196 (1.3)                      |
| Depression                                                  | 5,111 (3.9)                                 | 16,321 (2.6)                     |
| <b>Drugs frequently causing parkinsonism</b>                |                                             |                                  |
| Typical antipsychotics (piperazine side chain neuroleptics) | 2,308 (1.8)                                 | 9,115 (1.4)                      |
| Calcium-channel blockers                                    | 53,126 (40.4)                               | 127,167 (20.2)                   |
| <b>Modified CCI score*</b>                                  |                                             |                                  |
| Normal                                                      | 94,456 (71.9)                               | 509,388 (80.8)                   |
| Moderate                                                    | 19,848 (15.1)                               | 52,884 (8.4)                     |
| Severe                                                      | 11,860 (9.0)                                | 51,338 (8.1)                     |
| Very severe                                                 | 5,232 (4.0)                                 | 16,556 (2.6)                     |
| <b>Income</b>                                               |                                             |                                  |
| Low                                                         | 39,983 (30.4)                               | 165,356 (26.2)                   |
| Intermediate                                                | 37,309 (28.4)                               | 163,355 (25.9)                   |
| High                                                        | 30,093 (22.9)                               | 147,668 (23.4)                   |
| Very high                                                   | 23,971 (18.2)                               | 153,272 (24.3)                   |
| Missing                                                     | 40 (0.0)                                    | 515 (0.1)                        |
| <b>Employment</b>                                           |                                             |                                  |
| Employed                                                    | 40,956 (31.2)                               | 231,073 (36.7)                   |
| Early retirement                                            | 19,346 (14.7)                               | 75,547 (12.0)                    |
| Unemployed                                                  | 4,100 (3.1)                                 | 15,501 (2.5)                     |
| State pensioner                                             | 66,756 (50.8)                               | 305,731 (48.5)                   |
| Missing                                                     | 238 (0.2)                                   | 2,314 (0.4)                      |
| <b>Education</b>                                            |                                             |                                  |
| Basic education or primary school                           | 53,463 (40.7)                               | 222,997 (35.4)                   |
| Youth education, high school, or similar education          | 44,197 (33.6)                               | 219,647 (34.9)                   |
| Higher education                                            | 16,608 (12.6)                               | 114,198 (18.1)                   |
| Unknown                                                     | 17,128 (13.0)                               | 73,324 (11.6)                    |

Table values are given as n (%). CCI indicates Charlson Comorbidity Index.

\*Categories of comorbidity were based on modified Charlson Comorbidity Index scores: 0 (normal), 1 (moderate), 2 (severe), and ≥3 (very severe).

**Table S4.** Risk of parkinsonism following myocardial infarction compared with the general population cohort, by sex and age.

| Characteristics | Parkinson's disease         |                                 | Secondary parkinsonism      |                                 |
|-----------------|-----------------------------|---------------------------------|-----------------------------|---------------------------------|
|                 | Cumulative risk, % (95% CI) | Adjusted hazard ratio (95% CI)* | Cumulative risk, % (95% CI) | Adjusted hazard ratio (95% CI)* |
| Female          | 0.57 (0.47–0.68)            | 0.80 (0.68–0.95)                | 0.08 (0.05–0.13)            | 0.97 (0.57–1.68)                |
| Male            | 1.02 (0.92–1.14)            | 0.79 (0.72–0.88)                | 0.10 (0.07–0.13)            | 0.67 (0.48–0.93)                |
| <60 years       | 0.61 (0.47–0.79)            | 0.93 (0.73–1.19)                | 0.05 (0.03–0.10)            | 1.06 (0.41–2.73)                |
| 60-69 years     | 1.16 (0.99–1.37)            | 0.83 (0.71–0.97)                | 0.15 (0.10–0.22)            | 0.78 (0.49–1.22)                |
| 70-79 years     | 1.11 (0.98–1.25)            | 0.73 (0.64–0.84)                | 0.13 (0.08–0.19)            | 0.62 (0.39–0.98)                |
| 80+ years       | 0.48 (0.40–0.59)            | 0.76 (0.61–0.95)                | 0.03 (0.01–0.06)            | 0.46 (0.17–1.23)                |

CI indicates confidence interval.

\*Controlled for matching factors by study design and adjusted for heart failure, stable angina pectoris, atrial fibrillation/atrial flutter, valvular heart disease, hypercholesterolemia, hypertension, stroke, intermittent claudication, obesity, diabetes mellitus, chronic pulmonary disease, alcoholism-related disease, head trauma, osteoarthritis, anemia, chronic kidney disease, depression, a modified Charlson Comorbidity Index score, antipsychotics, calcium channel blockers, income, and employment.

**Table S5.** Risk of Parkinson’s disease and parkinsonism following myocardial infarction compared with the general population cohort, by history of comorbidity.

| Comorbidity                           | Parkinson’s disease         |                                 | Secondary parkinsonism      |                                 |
|---------------------------------------|-----------------------------|---------------------------------|-----------------------------|---------------------------------|
|                                       | Cumulative risk, % (95% CI) | Adjusted hazard ratio (95% CI)* | Cumulative risk, % (95% CI) | Adjusted hazard ratio (95% CI)* |
| <b>Heart failure</b>                  |                             |                                 |                             |                                 |
| Yes                                   | 0.50 (0.31–0.76)            | 0.65 (0.41–1.05)                | 0.04 (0.01–0.13)            | 0.33 (0.07–1.48)                |
| No                                    | 0.88 (0.80–0.97)            | 0.79 (0.73–0.86)                | 0.09 (0.07–0.12)            | 0.74 (0.57–0.96)                |
| <b>Angina pectoris</b>                |                             |                                 |                             |                                 |
| Yes                                   | 1.05 (0.82–1.32)            | 0.77 (0.62–0.95)                | 0.07 (0.04–0.13)            | 0.64 (0.32–1.26)                |
| No                                    | 0.84 (0.76–0.92)            | 0.79 (0.73–0.87)                | 0.09 (0.07–0.12)            | 0.74 (0.57–0.98)                |
| <b>Atrial fibrillation or flutter</b> |                             |                                 |                             |                                 |
| Yes                                   | 0.95 (0.70–1.27)            | 1.26 (0.92–1.73)                | 0.27 (0.08–0.72)            | 1.46 (0.63–3.39)                |
| No                                    | 0.86 (0.78–0.94)            | 0.79 (0.73–0.86)                | 0.09 (0.06–0.11)            | 0.69 (0.53–0.90)                |
| <b>Valvular heart disease</b>         |                             |                                 |                             |                                 |
| Yes                                   | 0.43 (0.22–0.80)            | 0.58 (0.30–1.12)                | 0.08 (0.01–0.45)            | 0.51 (0.05–5.10)                |
| No                                    | 0.87 (0.79–0.95)            | 0.79 (0.73–0.86)                | 0.09 (0.07–0.12)            | 0.72 (0.56–0.93)                |
| <b>Hypercholesterolemia</b>           |                             |                                 |                             |                                 |
| Yes                                   | 2.43 (0.86–5.45)            | 1.04 (0.69–1.58)                | 0.07 (0.02–0.17)            | 1.57 (0.43–5.71)                |
| No                                    | 0.84 (0.77–0.92)            | 0.78 (0.72–0.85)                | 0.09 (0.07–0.12)            | 0.71 (0.55–0.92)                |
| <b>Hypertension</b>                   |                             |                                 |                             |                                 |
| Yes                                   | 0.89 (0.76–1.04)            | 0.88 (0.76–1.03)                | 0.10 (0.06–0.18)            | 0.70 (0.44–1.11)                |
| No                                    | 0.85 (0.76–0.95)            | 0.75 (0.68–0.83)                | 0.09 (0.07–0.12)            | 0.73 (0.54–0.99)                |
| <b>Stroke</b>                         |                             |                                 |                             |                                 |
| Yes                                   | 0.61 (0.42–0.85)            | 0.78 (0.54–1.14)                | 0.14 (0.06–0.28)            | 0.88 (0.38–2.06)                |
| No                                    | 0.88 (0.80–0.96)            | 0.79 (0.73–0.86)                | 0.09 (0.07–0.12)            | 0.71 (0.54–0.93)                |
| <b>Intermittent Claudication</b>      |                             |                                 |                             |                                 |
| Yes                                   | 0.22 (0.08–0.52)            | 0.48 (0.18–1.31)                | –                           | –                               |
| No                                    | 0.87 (0.80–0.96)            | 0.79 (0.73–0.86)                | 0.09 (0.07–0.12)            | 0.73 (0.57–0.95)                |
| <b>Obesity</b>                        |                             |                                 |                             |                                 |
| Yes                                   | 0.51 (0.30–0.85)            | 0.72 (0.40–1.27)                | –                           | –                               |
| No                                    | 0.87 (0.79–0.95)            | 0.79 (0.73–0.86)                | 0.09 (0.07–0.12)            | 0.76 (0.59–0.98)                |
| <b>Diabetes mellitus</b>              |                             |                                 |                             |                                 |
| Yes                                   | 0.87 (0.65–1.14)            | 0.91 (0.70–1.18)                | 0.08 (0.04–0.17)            | 0.38 (0.17–0.85)                |
| No                                    | 0.86 (0.78–0.95)            | 0.78 (0.71–0.85)                | 0.09 (0.07–0.12)            | 0.78 (0.60–1.01)                |
| <b>Chronic pulmonary disease</b>      |                             |                                 |                             |                                 |
| Yes                                   | 0.45 (0.31–0.63)            | 0.66 (0.45–0.96)                | 0.05 (0.02–0.13)            | 0.57 (0.19–1.67)                |
| No                                    | 0.90 (0.82–0.98)            | 0.80 (0.73–0.87)                | 0.10 (0.07–0.12)            | 0.73 (0.57–0.95)                |
| <b>Alcoholism-related disease</b>     |                             |                                 |                             |                                 |
| Yes                                   | 0.68 (0.36–1.22)            | 0.98 (0.54–1.79)                | 0.28 (0.10–0.67)            | 1.53 (0.53–4.45)                |
| No                                    | 0.87 (0.79–0.95)            | 0.79 (0.72–0.86)                | 0.09 (0.07–0.11)            | 0.69 (0.53–0.90)                |
| <b>Head trauma</b>                    |                             |                                 |                             |                                 |
| Yes                                   | 0.79 (0.51–1.19)            | 0.93 (0.64–1.37)                | 0.14 (0.04–0.38)            | 0.81 (0.26–2.56)                |
| No                                    | 0.87 (0.79–0.95)            | 0.78 (0.72–0.85)                | 0.09 (0.07–0.12)            | 0.71 (0.55–0.93)                |
| <b>Osteoarthritis</b>                 |                             |                                 |                             |                                 |
| Yes                                   | 0.81 (0.63–1.04)            | 0.81 (0.63–1.04)                | 0.05 (0.02–0.12)            | 0.40 (0.17–0.94)                |
| No                                    | 0.87 (0.79–0.95)            | 0.79 (0.72–0.86)                | 0.10 (0.07–0.12)            | 0.78 (0.60–1.02)                |
| <b>Anemia</b>                         |                             |                                 |                             |                                 |



|                                                                                       |                  |                  |                  |                  |
|---------------------------------------------------------------------------------------|------------------|------------------|------------------|------------------|
| Yes                                                                                   | 0.44 (0.26–0.72) | 0.82 (0.47–1.43) | 0.06 (0.01–0.21) | 0.41 (0.09–1.86) |
| No                                                                                    | 0.87 (0.80–0.96) | 0.79 (0.73–0.86) | 0.09 (0.07–0.12) | 0.74 (0.57–0.95) |
| <b>Chronic kidney disease</b>                                                         |                  |                  |                  |                  |
| Yes                                                                                   | 0.74 (0.42–1.24) | 1.27 (0.67–2.39) | 0.09 (0.02–0.32) | 0.36 (0.08–1.72) |
| No                                                                                    | 0.87 (0.79–0.95) | 0.78 (0.72–0.85) | 0.09 (0.07–0.12) | 0.74 (0.57–0.95) |
| <b>Depression</b>                                                                     |                  |                  |                  |                  |
| Yes                                                                                   | 1.02 (0.54–1.78) | 0.54 (0.33–0.88) | 0.20 (0.07–0.45) | 0.72 (0.26–2.01) |
| No                                                                                    | 0.86 (0.78–0.94) | 0.80 (0.74–0.87) | 0.09 (0.07–0.12) | 0.72 (0.55–0.93) |
| <b>Modified CCI score</b>                                                             |                  |                  |                  |                  |
| Normal                                                                                | 0.91 (0.82–1.00) | 0.79 (0.72–0.87) | 0.09 (0.07–0.13) | 0.70 (0.53–0.94) |
| Moderate                                                                              | 0.63 (0.44–0.88) | 0.72 (0.54–0.95) | 0.08 (0.04–0.15) | 0.84 (0.38–1.84) |
| Severe                                                                                | 0.89 (0.66–1.17) | 0.85 (0.64–1.12) | 0.11 (0.05–0.23) | 0.73 (0.32–1.66) |
| Very severe                                                                           | 0.51 (0.25–0.96) | 0.91 (0.47–1.78) | 0.06 (0.01–0.21) | 1.39 (0.30–6.55) |
| <b>Typical antipsychotics use within the first year after myocardial infarction</b>   |                  |                  |                  |                  |
| Yes                                                                                   | 1.46 (0.61–3.02) | –                | 0.28 (0.03–1.49) | –                |
| No                                                                                    | 0.86 (0.79–0.94) | 0.80 (0.73–0.87) | 0.09 (0.07–0.12) | 0.71 (0.54–0.93) |
| <b>Calcium-channel blockers use within the first year after myocardial infarction</b> |                  |                  |                  |                  |
| Yes                                                                                   | 0.93 (0.77–1.12) | 0.72 (0.59–0.87) | 0.07 (0.04–0.12) | 0.71 (0.35–1.44) |
| No                                                                                    | 0.83 (0.75–0.92) | 0.82 (0.74–0.91) | 0.10 (0.07–0.13) | 0.75 (0.55–1.01) |

– Indicates insufficient data to compute a meaningful estimate; CCI, Charlson Comorbidity Index, CI, confidence interval.

\*Adjusted for age, sex, calendar year, heart failure, stable angina pectoris, atrial fibrillation/atrial flutter, valvular heart disease, hypercholesterolemia, hypertension, stroke, intermittent claudication, obesity, diabetes mellitus, chronic pulmonary disease, alcoholism-related disease, head trauma, osteoarthritis, anemia, chronic kidney disease, depression, a modified Charlson Comorbidity Index score, antipsychotics, calcium channel blockers, income, and employment (except the stratified variable).

**Table S6.** Risk of Parkinson’s disease and parkinsonism following myocardial infarction compared with the general population cohort, by calendar periods and type of myocardial infarction diagnosis.

| Year/diagnosis                                      | Parkinson’s disease         |                                 | Secondary parkinsonism      |                                 |
|-----------------------------------------------------|-----------------------------|---------------------------------|-----------------------------|---------------------------------|
|                                                     | Cumulative risk, % (95% CI) | Adjusted hazard ratio (95% CI)* | Cumulative risk, % (95% CI) | Adjusted hazard ratio (95% CI)* |
| <b>1995–1999</b>                                    | 0.85 (0.75–0.97)            | 0.79 (0.68–0.92)                | 0.12 (0.08–0.16)            | 0.93 (0.59–1.47)                |
| <b>2000–2004</b>                                    | 0.72 (0.62–0.83)            | 0.75 (0.64–0.87)                | 0.08 (0.06–0.12)            | 0.77 (0.48–1.23)                |
| <b>2005–2009</b>                                    | 0.69 (0.58–0.82)            | 0.91 (0.77–1.09)                | 0.01 (0.01–0.04)            | 0.15 (0.05–0.43)                |
| <b>2010–2016</b>                                    | 0.26 (0.18–0.35)            | 0.75 (0.55–1.02)                | 0.03 (0.01–0.06)            | 0.31 (0.06–1.72)                |
| <b>Primary diagnosis of myocardial infarction</b>   | 0.88 (0.80–0.97)            | 0.80 (0.73–0.87)                | 0.10 (0.07–0.12)            | 0.72 (0.54–0.95)                |
| <b>Secondary diagnosis of myocardial infarction</b> | 0.60 (0.44–0.82)            | 0.89 (0.63–1.24)                | 0.05 (0.02–0.12)            | 0.62 (0.11–3.45)                |

CI indicates confidence interval.

\*Controlled for matching factors by study design and adjusted for heart failure, stable angina pectoris, atrial fibrillation/atrial flutter, valvular heart disease, hypercholesterolemia, hypertension, stroke, intermittent claudication, obesity, diabetes mellitus, chronic pulmonary disease, alcoholism-related disease, head trauma, osteoarthritis, anemia, chronic kidney disease, depression, a modified Charlson Comorbidity Index score, antipsychotics, calcium channel blockers, income, and employment.

**Table S7.** Risk of Parkinson’s disease and parkinsonism following myocardial infarction compared with the general population cohort, restricted to different socioeconomic status levels in both cohorts.

| Socioeconomic characteristics                     | Parkinson’s disease         |                                 | Secondary parkinsonism      |                                 |
|---------------------------------------------------|-----------------------------|---------------------------------|-----------------------------|---------------------------------|
|                                                   | Cumulative risk, % (95% CI) | Adjusted hazard ratio (95% CI)* | Cumulative risk, % (95% CI) | Adjusted hazard ratio (95% CI)* |
| <b>Income</b>                                     |                             |                                 |                             |                                 |
| Low                                               | 0.73 (0.63–0.85)            | 0.69 (0.59–0.81)                | 0.09 (0.06–0.13)            | 0.61 (0.39–0.95)                |
| Intermediate                                      | 0.97 (0.82–1.14)            | 0.88 (0.76–1.02)                | 0.10 (0.06–0.15)            | 0.79 (0.50–1.25)                |
| High                                              | 0.80 (0.67–0.97)            | 0.75 (0.63–0.89)                | 0.09 (0.05–0.15)            | 0.70 (0.41–1.18)                |
| Very high                                         | 0.93 (0.74–1.16)            | 0.86 (0.71–1.04)                | 0.10 (0.05–0.20)            | 0.95 (0.49–1.87)                |
| Unknown                                           | 2.73 (0.21–12.12)           | 2.17 (0.18–26.46)               | –                           | –                               |
| <b>Employment</b>                                 |                             |                                 |                             |                                 |
| Employed                                          | 0.82 (0.68–0.98)            | 0.92 (0.78–1.08)                | 0.08 (0.05–0.14)            | 0.94 (0.55–1.59)                |
| Early retirement                                  | 1.10 (0.84–1.41)            | 0.84 (0.68–1.03)                | 0.13 (0.06–0.24)            | 0.74 (0.41–1.36)                |
| Unemployed                                        | 0.76 (0.33–1.58)            | 0.80 (0.42–1.50)                | 0.13 (0.04–0.33)            | 2.72 (0.77–9.65)                |
| State pensioner                                   | 0.82 (0.74–0.91)            | 0.73 (0.66–0.82)                | 0.09 (0.06–0.12)            | 0.60 (0.42–0.84)                |
| Missing                                           | 2.44 (0.56–6.98)            | 1.76 (0.50–6.23)                | –                           | –                               |
| <b>Education</b>                                  |                             |                                 |                             |                                 |
| Basic education, primary school                   | 0.82 (0.71–0.94)            | 0.78 (0.68–0.88)                | 0.09 (0.06–0.13)            | 0.74 (0.51–1.08)                |
| Youth education, high school or similar education | 1.01 (0.85–1.18)            | 0.90 (0.78–1.03)                | 0.13 (0.08–0.20)            | 0.92 (0.61–1.40)                |
| Higher education                                  | 1.12 (0.84–1.48)            | 0.74 (0.59–0.93)                | 0.09 (0.03–0.21)            | 0.54 (0.23–1.25)                |
| Unknown                                           | 0.51 (0.40–0.64)            | 0.72 (0.57–0.92)                | 0.04 (0.02–0.08)            | 0.44 (0.19–1.02)                |

– Indicates insufficient data to compute a meaningful estimate; CI, confidence interval.

\*Adjusted for age, sex, calendar year, heart failure, stable angina pectoris, atrial fibrillation/atrial flutter, valvular heart disease, hypercholesterolemia, hypertension, stroke, intermittent claudication, obesity, diabetes mellitus, chronic pulmonary disease, alcoholism-related disease, head trauma, osteoarthritis, anemia, chronic kidney disease, depression, a modified Charlson Comorbidity Index score, antipsychotics, calcium channel blockers, income, and employment (except the stratified variable).

**Table S8.** Sensitivity analyses of the association between myocardial infarction and risk of Parkinson's disease and parkinsonism.

| Analysis change                                                     | Parkinson's disease         |                                 | Secondary parkinsonism      |                                 |
|---------------------------------------------------------------------|-----------------------------|---------------------------------|-----------------------------|---------------------------------|
|                                                                     | Cumulative risk, % (95% CI) | Adjusted hazard ratio (95% CI)* | Cumulative risk, % (95% CI) | Adjusted hazard ratio (95% CI)* |
| <b>Excluding initial years of follow-up (years since diagnosis)</b> |                             |                                 |                             |                                 |
| 2–22 years                                                          | 0.87 (0.78–0.95)            | 0.81 (0.74–0.89)                | 0.09 (0.07–0.12)            | 0.73 (0.54–0.98)                |
| 3–22 years                                                          | 0.85 (0.76–0.94)            | 0.81 (0.73–0.89)                | 0.09 (0.07–0.12)            | 0.75 (0.55–1.03)                |
| 5–22 years                                                          | 0.82 (0.73–0.92)            | 0.82 (0.73–0.92)                | 0.10 (0.07–0.13)            | 0.91 (0.63–1.30)                |
| <b>Additionally adjusting for education</b>                         | 0.86 (0.79–0.94)            | 0.80 (0.73–0.87)                | 0.09 (0.07–0.12)            | 0.72 (0.54–0.94)                |
| <b>Disaggregating the follow-up</b>                                 |                             |                                 |                             |                                 |
| 1–5 years                                                           | 0.22 (0.20–0.25)            | 0.76 (0.66–0.87)                | 0.02 (0.01–0.03)            | 0.51 (0.32–0.82)                |
| 6–10 years                                                          | 0.33 (0.29–0.38)            | 0.81 (0.69–0.94)                | 0.04 (0.03–0.06)            | 0.75 (0.46–1.23)                |
| 11–15 years                                                         | 0.41 (0.35–0.49)            | 0.92 (0.75–1.13)                | 0.05 (0.03–0.08)            | 1.35 (0.71–2.58)                |
| 16 years–22 years                                                   | 0.33 (0.22–0.47)            | 0.68 (0.44–1.04)                | –                           | –                               |
| <b>Type of myocardial infarction</b>                                |                             |                                 |                             |                                 |
| STEMI                                                               | 1.03 (0.72–1.44)            | 0.80 (0.62–1.05)                | 0.05 (0.02–0.13)            | 0.46 (0.17–1.27)                |
| Non-STEMI                                                           | 0.89 (0.74–1.06)            | 0.93 (0.79–1.09)                | 0.07 (0.04–0.13)            | 0.61 (0.33–1.14)                |

– Indicates insufficient data to compute a meaningful estimate; CI, confidence interval, STEMI, ST-segment elevation myocardial infarction.

\*Controlled for matching factors by study design and adjusted for heart failure, stable angina pectoris, atrial fibrillation/atrial flutter, valvular heart disease, hypercholesterolemia, hypertension, stroke, intermittent claudication, obesity, diabetes mellitus, chronic pulmonary disease, alcoholism-related disease, head trauma, osteoarthritis, anemia, chronic kidney disease, depression, a modified Charlson Comorbidity Index score, antipsychotics, calcium channel blockers, income, and employment.

**Figure S1.** Required strength of an unmeasured confounder for Parkinson’s disease (upper panel) and secondary parkinsonism (lower panel) to fully explain the main estimate counterpart. The graphs illustrate how strongly an unmeasured confounder would need to be associated with myocardial infarction (prevalence ratio for exposure–confounder association [PRE<sub>C</sub>]) and Parkinson’s disease or secondary parkinsonism (relative risk of the disease in patients with the confounder [RR<sub>CD</sub>]) to fully explain away our estimates. The graphs depict the adjusted hazard ratio for the outcomes along with the upper limit of the 95% confidence interval (CI).

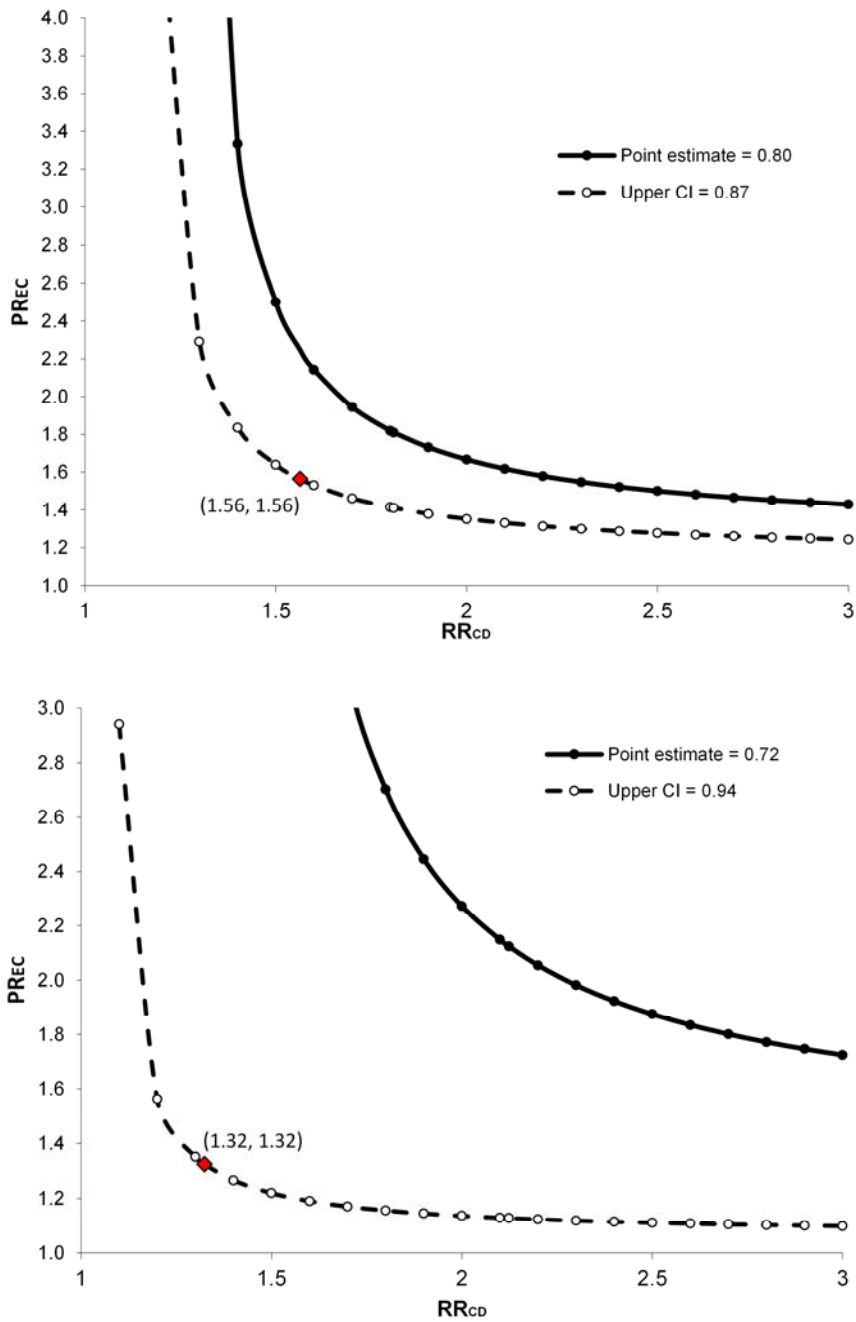

Supplement: JAH3-11-e022768-s001.pdf [file JAH3-11-e022768-s001.pdf]
